# Supplementary material for: HIV-1 Residual Viremia Correlates with Persistent T-Cell Activation in Poor Immunological Responders to Combination Antiretroviral Therapy
Source: PubMed Central journal article supplement (PMC2765414; doi:10.1371/journal.pone.0007658), 2009-10-30
Supplement: pone.0007658.s001.pdf [file pone.0007658.s001.pdf]

| Immune reconstitution group   | Patient n <sup>o</sup> | Gender | Age <sup>a</sup> | Duration of HIV-1 infection since diagnosis <sup>a</sup> | CD4 <sup>+</sup> T-cell count nadir <sup>b</sup> | Pre-cART CD4 <sup>+</sup> T-cell count <sup>b</sup> | Pre-cART plasma viral load <sup>c</sup> | Duration of cART <sup>d</sup> | cART regimen at time of analysis | CD4 <sup>+</sup> T-cell count at time of analysis <sup>b</sup> | Plasma viral load at time of analysis <sup>e</sup> |
|-------------------------------|------------------------|--------|------------------|----------------------------------------------------------|--------------------------------------------------|-----------------------------------------------------|-----------------------------------------|-------------------------------|----------------------------------|----------------------------------------------------------------|----------------------------------------------------|
| Poor immunological responders | 1                      | M      | 41               | 13                                                       | 91                                               | 91                                                  | 5                                       | 65                            | 3TC EFV RTV/FPV                  | 268                                                            | <50                                                |
|                               | 2                      | M      | 47               | 14                                                       | 66                                               | 66                                                  | 5                                       | 25                            | AZT 3TC LPV/RTV                  | 164                                                            | <50                                                |
|                               | 3                      | M      | 43               | 8                                                        | 71                                               | 71                                                  | 2.9                                     | 97                            | AZT 3TC ABC                      | 236                                                            | <50                                                |
|                               | 6                      | M      | 34               | 3                                                        | 62                                               | 62                                                  | 4.6                                     | 36                            | AZT 3TC EFV                      | 229                                                            | <50                                                |
|                               | 8                      | M      | 62               | 12                                                       | 4                                                | 4                                                   | 5.9                                     | 98                            | AZT 3TC NVP                      | 179                                                            | <50                                                |
|                               | 10                     | M      | 65               | 11                                                       | 5                                                | 22                                                  | 4                                       | 98                            | 3TC ABC NVP                      | 239                                                            | <50                                                |
|                               | 11                     | M      | 54               | 12                                                       | 51                                               | 51                                                  | 4.6                                     | 60                            | AZT 3TC ABC                      | 278                                                            | <50                                                |
|                               | 12                     | M      | 57               | 13                                                       | 106                                              | 211                                                 | 6.6                                     | 36                            | AZT 3TC LPV/RTV                  | 233                                                            | <50                                                |
|                               | 13                     | M      | 58               | 6                                                        | 75                                               | 101                                                 | 4.8                                     | 84                            | AZT 3TC NVP                      | 219                                                            | <50                                                |
| 15                            | M                      | 58     | 16               | 7                                                        | 114                                              | 6                                                   | 64                                      | AZT 3TC ABC EFV               | 206                              | <50                                                            |                                                    |
| Good immunological responders | 16                     | F      | 50               | 15                                                       | 155                                              | 155                                                 | 6.1                                     | 94                            | 3TC TDF NVP                      | 985                                                            | <50                                                |
|                               | 17                     | M      | 46               | 10                                                       | 195                                              | 195                                                 | 4.1                                     | 84                            | DDI FTC EFV                      | 771                                                            | <50                                                |
|                               | 18                     | M      | 47               | 8                                                        | 22                                               | 139                                                 | 5.7                                     | 48                            | AZT 3TC ABC                      | 776                                                            | <50                                                |
|                               | 19                     | M      | 42               | 6                                                        | 156                                              | 323                                                 | 4.6                                     | 72                            | AZT 3TC ABC                      | 716                                                            | <50                                                |
|                               | 20                     | M      | 48               | 7                                                        | 111                                              | 111                                                 | 5.5                                     | 72                            | D4T 3TC IDV                      | 818                                                            | <50                                                |
|                               | 22                     | M      | 42               | 14                                                       | 66                                               | 66                                                  | 5.5                                     | 84                            | AZT 3TC NVP                      | 888                                                            | <50                                                |
|                               | 24                     | M      | 51               | 8                                                        | 281                                              | 281                                                 | 3.9                                     | 48                            | AZT 3TC ABC                      | 730                                                            | <50                                                |
|                               | 25                     | F      | 63               | 8                                                        | 205                                              | 205                                                 | 4.9                                     | 96                            | 3TC ABC NVP NFV                  | 910                                                            | <50                                                |
|                               | 26                     | M      | 47               | 7                                                        | 167                                              | 167                                                 | 5.6                                     | 84                            | D4T 3TC IDV                      | 813                                                            | <50                                                |
|                               | 27                     | F      | 40               | 10                                                       | 197                                              | 220                                                 | 5.2                                     | 104                           | D4T 3TC NVP                      | 757                                                            | <50                                                |
|                               | 28                     | M      | 41               | 11                                                       | 1                                                | 1                                                   | 6.3                                     | 72                            | D4T 3TC IDV/RTV                  | 1132                                                           | <50                                                |
|                               | 29                     | M      | 36               | 9                                                        | 102                                              | 102                                                 | 5.8                                     | 91                            | D4T 3TC NVP                      | 790                                                            | <50                                                |
| 30                            | M                      | 38     | 14               | 112                                                      | 112                                              | 5.2                                                 | 84                                      | AZT 3TC NFV                   | 987                              | <50                                                            |                                                    |
| <b>P between groups</b>       | -                      | 0.23   | 0.11             | 0.40                                                     | <0.01                                            | 0.02                                                | 0.42                                    | 0.32                          | -                                | -                                                              | -                                                  |

<sup>a</sup> years

<sup>b</sup> cells/mm<sup>3</sup>

<sup>c</sup> log<sub>10</sub> copies/ml

<sup>d</sup> months

<sup>e</sup> copies/ml
