# Supplementary material for: HIV-1 Residual Viremia Correlates with Persistent T-Cell Activation in Poor Immunological Responders to Combination Antiretroviral Therapy
Source: PubMed Central journal article supplement (PMC2765414; doi:10.1371/journal.pone.0007658), 2009-10-30

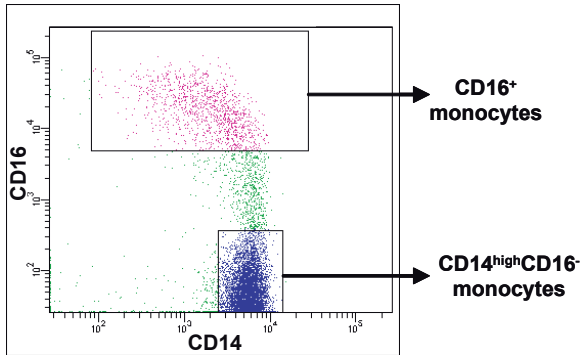

Supplement: pone.0007658.s002.pdf [file pone.0007658.s002.pdf]
