# Supplementary material for: HIV-1 Residual Viremia Correlates with Persistent T-Cell Activation in Poor Immunological Responders to Combination Antiretroviral Therapy
Source: PubMed Central journal article supplement (PMC2765414; doi:10.1371/journal.pone.0007658), 2009-10-30
Supplement: pone.0007658.s003.pdf [file pone.0007658.s003.pdf]

| Patient no.                            | No. of clones / total tested | Amino acid sequence of the V3 env region                                | Predicted genotype |
|----------------------------------------|------------------------------|-------------------------------------------------------------------------|--------------------|
| <b>1</b>                               |                              |                                                                         |                    |
| <b>Plasma at baseline</b>              |                              |                                                                         |                    |
|                                        | Consensus                    | C T R P N N N T R K G I R V G P G R A I Y A T E K I I G N I R Q A H C   |                    |
|                                        | 6/14                         | . . . . .                                                               | X4                 |
|                                        | 1/14                         | . . . . . E . . . . .                                                   | X4                 |
|                                        | 1/14                         | . . . H . . . . .                                                       | X4                 |
|                                        | 2/14                         | . . . H . . . . S . H I . . . . F . . . G E . V . D . . . . .           | R5                 |
|                                        | 1/14                         | . . . H . . . . S . H I . . . . F . . . G E M V . D . . . . .           | R5                 |
|                                        | 1/14                         | . . . . . S . H I . . . . F . . . G D . . . . D . . . . .               | R5                 |
|                                        | 1/14                         | . . . H . . . . S . H I . . . . F . . . G E . . . . D . . . . .         | R5                 |
|                                        | 1/14                         | . . . H . . . . S . H I . . . . F . . . G D . . . . D . . . . .         | R5                 |
| <b>Plasma on cART</b>                  |                              |                                                                         |                    |
|                                        | Consensus                    | C T R P N N N T R K G I R I G P G R A I Y A T E K I I G N I R Q A H C   |                    |
|                                        | 8/23                         | . . . . . V . . . . .                                                   | X4                 |
|                                        | 1/23                         | . . . . . V . . . . . T . . . . .                                       | X4                 |
|                                        | 1/23                         | R . . . . . V . . . . .                                                 | X4                 |
|                                        | 6/23                         | . . . . .                                                               | X4                 |
|                                        | 1/23                         | . . . . . A . . . . .                                                   | X4                 |
|                                        | 4/23                         | . . . H . . . . S . H . . . . F . . . G E . . . . D . . . . .           | R5                 |
|                                        | 1/23                         | . . . . . S . H . . . . F . . . G G . . . . D . . . . .                 | R5                 |
|                                        | 1/23                         | . . . . . S . H . . . . F . . . A G G . . . . D . . . . .               | R5                 |
| <b>CD4<sup>+</sup> T-cells on cART</b> |                              |                                                                         |                    |
|                                        | Consensus                    | C T R P N N N T R K G I R V G P G R A I Y A T E K I I G N I R Q A H C   |                    |
|                                        | 8/12                         | . . . . .                                                               | X4                 |
|                                        | 1/12                         | . . . . . L . . . . .                                                   | X4                 |
|                                        | 1/12                         | . . . . . I . . . . .                                                   | X4                 |
|                                        | 1/12                         | . . . . . K . . . . R . . . . . K . . . . .                             | X4                 |
|                                        | 1/12                         | . . . H . . . . S . H I . . . . F . . . G G . . . . D . . . . .         | R5                 |
| <b>2</b>                               |                              |                                                                         |                    |
| <b>Plasma at baseline</b>              |                              |                                                                         |                    |
|                                        | Consensus                    | C T R P N N N T R K S I N I A P G R A I Y A T G A I I G N I R Q A H C   |                    |
|                                        | 8/11                         | . . . . .                                                               | R5                 |
|                                        | 2/11                         | . . . . . D . . . . .                                                   | R5                 |
|                                        | 1/11                         | . . . . . G . H M G . . . G T F F . . . . .                             | R5                 |
| <b>Plasma on cART</b>                  |                              |                                                                         |                    |
|                                        | Consensus                    | C T R P N N N T R K G I H M G P G G T F F A T G A I I G N I R Q A H C   |                    |
|                                        | 10/13                        | . . . . .                                                               | R5                 |
|                                        | 1/13                         | . . . . . V . . . . .                                                   | R5                 |
|                                        | 1/13                         | . . . . . V . . . . .                                                   | R5                 |
|                                        | 1/13                         | . . . . . L . . . . .                                                   | R5                 |
| <b>CD4<sup>+</sup> T-cells on cART</b> |                              |                                                                         |                    |
|                                        | Consensus                    | C T R P N N N T R K S I H I G P G R A F Y A T G Q I I G D I R Q A H C   |                    |
|                                        | 4/12                         | . . . . . G . M . . . . T . . . . .                                     | R5                 |
|                                        | 3/12                         | . . . . . T . . . . S . F . . . G . . . . .                             | R5                 |
|                                        | 1/12                         | . . . . . T . . . . S . F . . . G . . . N . . . . .                     | R5                 |
|                                        | 2/12                         | . . . . . N . A . . . . I . . . . A . . . N . . . . .                   | R5                 |
|                                        | 1/12                         | . . . . . P . . . . . I . . . . D . . . . .                             | R5                 |
|                                        | 1/12                         | . . . . . G . R . . . . I T . D R . . . . .                             | X4                 |
| <b>3</b>                               |                              |                                                                         |                    |
| <b>Plasma at baseline</b>              |                              |                                                                         |                    |
|                                        | Consensus                    | C T R P N N N T R K ~ G I H I G P G R A F Y T T G Q I I G D I R Q A H C |                    |
|                                        | 12/13                        | . . . . . ~ . . . . .                                                   | R5                 |
|                                        | 1/13                         | . . . . S . . . . ~ . . . . .                                           | R5                 |
| <b>Plasma on cART</b>                  |                              |                                                                         |                    |
|                                        | Consensus                    | C T R P N N N T R K ~ S I H I G P G S A F Y T T G Q I I G D I R Q A H C |                    |
|                                        | 8/11                         | . . . . . ~ . . . . .                                                   | R5                 |
|                                        | 1/11                         | . . . . . I . . . . ~ . . . . .                                         | R5                 |
|                                        | 1/11                         | . . . . . D . . . . ~ . . . . .                                         | R5                 |
|                                        | 1/11                         | . . . . . A . . . . ~ . . . . .                                         | R5                 |
| <b>CD4<sup>+</sup> T-cells on cART</b> |                              |                                                                         |                    |
|                                        | Consensus                    | C T R P N N N I K K R R I H I G P G R A F Y T T G Q L I G D I R Q A H C |                    |
|                                        | 2/12                         | . . . . H . S . . . R . . . . . ~ . . . . .                             | X4                 |
|                                        | 1/12                         | . . . . H . S . . . . . R . . . . ~ . . . . .                           | X4                 |
|                                        | 2/12                         | . . . . . R . . . . ~ . . . . .                                         | X4                 |
|                                        | 3/12                         | . . . . S . . . . . R . . . . ~ . . . . .                               | X4                 |
|                                        | 3/12                         | . . . . . T R . ~ S . . . . . I . . . . .                               | R5                 |
|                                        | 1/12                         | . . . . . T R . ~ S . . T . . . . . I . . . . .                         | R5                 |
| <b>6</b>                               |                              |                                                                         |                    |
| <b>Plasma at baseline</b>              |                              |                                                                         |                    |
|                                        | Consensus                    | C T R P N N N T R K G I H V G P G R T L Y A T G D I T G D I R Q A H C   |                    |
|                                        | 6/10                         | . . . . .                                                               | R5                 |
|                                        | 1/10                         | . . . . . I . . . . .                                                   | R5                 |
|                                        | 1/10                         | . . . . . M . . . . V . . . . E . I . . . . .                           | R5                 |
|                                        | 1/10                         | . . . . . M . . . . V . . . . I . . . . .                               | R5                 |
|                                        | 1/10                         | . . . . . T . . . . . E . . . . . R . . . . .                           | R5                 |

| Patient no.                            | No. of clones / total tested | Amino acid sequence of the V3 env region                              | Predicted genotype |
|----------------------------------------|------------------------------|-----------------------------------------------------------------------|--------------------|
| <b>6 (continued)</b>                   |                              |                                                                       |                    |
| <b>Plasma on cART</b>                  |                              |                                                                       |                    |
|                                        | Consensus                    | C T R P N N N T R R G I R I G P G R T L Y A T Q K I I G D I R Q A H C |                    |
|                                        | 12/15                        | .....R.....                                                           | X4                 |
|                                        | 1/15                         | .....S.....                                                           | X4                 |
|                                        | 1/15                         | .....R.....                                                           | X4                 |
|                                        | 1/15                         | R.....                                                                | X4                 |
| <b>CD4<sup>+</sup> T-cells on cART</b> |                              |                                                                       |                    |
|                                        | Consensus                    | C T R P N N N T R R G I H I G P G R T L Y A T Q K I I G D I R Q A H C |                    |
|                                        | 3/11                         | .....R.....                                                           | X4                 |
|                                        | 1/11                         | .....                                                                 | X4                 |
|                                        | 2/11                         | .....S.....K.....                                                     | X4                 |
|                                        | 2/11                         | .....R.....                                                           | X4                 |
|                                        | 1/11                         | S.....R.....                                                          | R5                 |
|                                        | 2/11                         | .....S.....A.....G D.....                                             | R5                 |
| <b>11</b>                              |                              |                                                                       |                    |
| <b>Plasma at baseline</b>              |                              |                                                                       |                    |
|                                        | Consensus                    | C E R P N N N T S K S I T M G P G R A F F V T G G I I G D I R Q A H C |                    |
|                                        | 6/10                         | .....                                                                 | R5                 |
|                                        | 1/10                         | .....I.....A E R.....R.....                                           | R5                 |
|                                        | 2/10                         | A.....G.....P L.....A E R.....R.....                                  | R5                 |
|                                        | 1/10                         | A.....G.....P L.....V.....A E R.....R.....                            | R5                 |
| <b>PBMC at baseline</b>                |                              |                                                                       |                    |
|                                        | Consensus                    | C E R P N N N T S K S I T M G P G R A F F V T G G I I G D I R Q A H C |                    |
|                                        | 5/12                         | .....                                                                 | R5                 |
|                                        | 1/12                         | .....S.....                                                           | R5                 |
|                                        | 2/12                         | .....L.....                                                           | R5                 |
|                                        | 1/12                         | .....I.....A.....R.....N.....                                         | R5                 |
|                                        | 1/12                         | T.....R.....I.....A.....E.....                                        | R5                 |
|                                        | 1/12                         | .....S.....R.....I.....A.....                                         | R5                 |
|                                        | 1/12                         | V.....G.....P L.....A E R.....                                        | R5                 |
| <b>Plasma on cART</b>                  |                              |                                                                       |                    |
|                                        | Consensus                    | C T R P G N N T S K S I P L G P G R A F F A T E R I I G D I R R A H C |                    |
|                                        | 13/23                        | .....                                                                 | R5                 |
|                                        | 1/23                         | .....T.....                                                           | R5                 |
|                                        | 1/23                         | .....                                                                 | R5                 |
|                                        | 2/23                         | E.....N.....T M.....V.....G.....N.....Q.....                          | R5                 |
|                                        | 2/23                         | E.....N.....T M.....V.....G.....V.....Q.....                          | R5                 |
|                                        | 2/23                         | E.....N.....T I.....G.....Q.....Y.....                                | R5                 |
|                                        | 1/23                         | E.....N.....T I.....G.....R.....Q.....Y.....                          | R5                 |
|                                        | 1/23                         | E.....N.....T I.....G.....N.....Q.....                                | R5                 |
| <b>CD4<sup>+</sup> T-cells on cART</b> |                              |                                                                       |                    |
|                                        | Consensus                    | C E R P N N N T S K S I T M G P G R A F F V T G R I I G A I R Q A H C |                    |
|                                        | 6/13                         | .....                                                                 | R5                 |
|                                        | 1/13                         | .....D.....M.....                                                     | R5                 |
|                                        | 5/13                         | T.....G.....P L.....A E.....D.....R.....                              | R5                 |
|                                        | 1/13                         | T.....G.....P L.....A.....                                            | R5                 |
| <b>12</b>                              |                              |                                                                       |                    |
| <b>Plasma at baseline</b>              |                              |                                                                       |                    |
|                                        | Consensus                    | C T R P S N N T R R G I H I G P G R A F Y A T G E V T G D I R Q A H C |                    |
|                                        | 4/12                         | .....                                                                 | R5                 |
|                                        | 4/12                         | .....T.....                                                           | R5                 |
|                                        | 1/12                         | .....Y.....K.....T.....T.....                                         | R5                 |
|                                        | 2/12                         | .....G.....K.....Y.....V.....E R I.....R.....                         | X4                 |
|                                        | 1/12                         | .....G.....K.....Y.....V.....E R I.....R.....Y.....                   | X4                 |
| <b>PBMC at baseline</b>                |                              |                                                                       |                    |
|                                        | Consensus                    | C T R P G N N T R K G I Y I G P G R A V Y A T E R I T G D I R R A H C |                    |
|                                        | 10/14                        | .....                                                                 | X4                 |
|                                        | 1/14                         | .....S.....R.....H.....F.....G E V.....Q.....                         | R5                 |
|                                        | 1/14                         | .....S.....R.....H.....F.....T.....G E V.....Q.....                   | R5                 |
|                                        | 1/14                         | .....S.....R.....H.....G.....F.....T.....G E V.....Q.....             | R5                 |
|                                        | 1/14                         | .....S.....S.....R.....H.....F.....T.....G E V.....Q.....             | R5                 |
| <b>Plasma on cART</b>                  |                              |                                                                       |                    |
|                                        | Consensus                    | C T R P S N N T R R G I H I G P G R A F Y A T G E V T G D I R Q A H C |                    |
|                                        | 14/14                        | .....                                                                 | R5                 |
| <b>CD4<sup>+</sup> T-cells on cART</b> |                              |                                                                       |                    |
|                                        | Consensus                    | C T R P G N N T R K G I Y I G P G R A V Y A T E R I T G D I R R A H C |                    |
|                                        | 6/10                         | .....                                                                 | X4                 |
|                                        | 1/10                         | .....S.....T.....                                                     | X4                 |
|                                        | 1/10                         | .....S.....S.....V I.....                                             | X4                 |
|                                        | 1/10                         | .....Q.....                                                           | R5                 |
|                                        | 1/10                         | .....Y.....H.....T F.....T.....G E V.....Q.....                       | R5                 |



| Patient no.                                                     | No. of clones / total tested | Amino acid sequence of the V3 env region                                  | Predicted genotype |
|-----------------------------------------------------------------|------------------------------|---------------------------------------------------------------------------|--------------------|
| <b>16 (continued)</b>                                           |                              |                                                                           |                    |
| <b>Plasma on cART</b>                                           |                              |                                                                           |                    |
|                                                                 | Consensus                    | C T R P Y Y I I K R N R I H I G P G R T F V T T G Q I A G K L K E A H C   |                    |
|                                                                 | 11/16                        | .....                                                                     | X4                 |
|                                                                 | 1/16                         | ..... S .....                                                             | X4                 |
|                                                                 | 1/16                         | ..... E .....                                                             | X4                 |
|                                                                 | 1/16                         | ..... K D .....                                                           | X4                 |
|                                                                 | 2/16                         | ..... D .....                                                             | X4                 |
| <b>CD4<sup>+</sup> T-cells on cART</b>                          |                              |                                                                           |                    |
|                                                                 | Consensus                    | C T R P Y Y I I K Q N R I H I G P G R T F V T T G Q I A G K L K E A H C   |                    |
|                                                                 | 3/10                         | ..... R .....                                                             | X4                 |
|                                                                 | 2/10                         | .....                                                                     | X4                 |
|                                                                 | 1/10                         | ..... G .....                                                             | X4                 |
|                                                                 | 1/10                         | .....                                                                     | X4                 |
|                                                                 | 2/10                         | ..... N N N T R ~ K S ..... A F A ..... D I ..... I R .....               | R5                 |
|                                                                 | 1/10                         | ..... N N N T R ~ K S ..... A F A ..... I G I R Q .....                   | R5                 |
| <b>CD14<sup>high</sup> CD16<sup>low</sup> monocytes on cART</b> |                              |                                                                           |                    |
|                                                                 | Consensus                    | C S R P Y Y I I L K Q N R I H I G P G R T F V T T G Q I A G K L K E A H C |                    |
|                                                                 | 12/15                        | .....                                                                     | X4                 |
|                                                                 | 1/15                         | ..... S .....                                                             | X4                 |
|                                                                 | 1/15                         | ..... C .....                                                             | X4                 |
|                                                                 | 1/15                         | ..... A .....                                                             | X4                 |
| <b>18</b>                                                       |                              |                                                                           |                    |
| <b>CD4<sup>+</sup> T-cells on cART</b>                          |                              |                                                                           |                    |
|                                                                 | Consensus                    | C T R P N N N T R K S I H I ~ ~ G P G R T L Y A T G E I I G D I R Q A H C |                    |
|                                                                 | 5/14                         | .....                                                                     | R5                 |
|                                                                 | 2/14                         | ..... ~ ~ ~ ..... N ..... Y .....                                         | R5                 |
|                                                                 | 3/14                         | ..... ~ ~ ~ ..... D .....                                                 | R5                 |
|                                                                 | 1/14                         | ..... R ~ ~ ~ .....                                                       | R5                 |
|                                                                 | 1/14                         | ..... G .....                                                             | R5                 |
|                                                                 | 1/14                         | ..... ~ ~ ~ ..... K .....                                                 | R5                 |
|                                                                 | 1/14                         | ..... ~ ~ ~ ..... K ..... N ..... Y .....                                 | R5                 |
| <b>CD14<sup>high</sup> CD16<sup>low</sup> monocytes on cART</b> |                              |                                                                           |                    |
|                                                                 | Consensus                    | C T R P N N N T R K D I H I ~ ~ R P G R A F Y A T ~ D I I R N I R Q A H C |                    |
|                                                                 | 11/21                        | ..... ~ ~ ~ ..... ~ .....                                                 | R5                 |
|                                                                 | 1/21                         | ..... ~ ~ ~ ..... R .....                                                 | R5                 |
|                                                                 | 2/21                         | ..... ~ ~ ~ ..... M .....                                                 | R5                 |
|                                                                 | 1/21                         | ..... ~ ~ ~ ..... H .....                                                 | R5                 |
|                                                                 | 1/21                         | ..... S R Q R G ..... V T I G K ~ G M .....                               | X4                 |
|                                                                 | 3/21                         | ..... I ..... S R Q R G ..... V T I G K ~ G M .....                       | X4                 |
|                                                                 | 1/21                         | ..... S I ..... S R Q R G ..... V T I G K ~ G M .....                     | X4                 |
|                                                                 | 1/21                         | ..... S C Q R G ..... V T I G K ~ G M .....                               | X4                 |
| <b>19</b>                                                       |                              |                                                                           |                    |
| <b>PBMC at baseline</b>                                         |                              |                                                                           |                    |
|                                                                 | Consensus                    | C T R P N N N T R R S V P I ~ ~ G P G R A F Y T S ~ E I I G N I R Q A H C |                    |
|                                                                 | 8/13                         | .....                                                                     | R5                 |
|                                                                 | 1/13                         | ..... I .....                                                             | R5                 |
|                                                                 | 1/13                         | ..... I ..... E .....                                                     | R5                 |
|                                                                 | 2/13                         | ..... H .....                                                             | R5                 |
|                                                                 | 1/13                         | .....                                                                     | R5                 |
| <b>CD4<sup>+</sup> T-cells on cART</b>                          |                              |                                                                           |                    |
|                                                                 | Consensus                    | C T R P N N N T R R S V P I ~ ~ G P G R A F Y T S ~ E I I G N I R Q A H C |                    |
|                                                                 | 7/11                         | .....                                                                     | R5                 |
|                                                                 | 2/11                         | ..... S .....                                                             | R5                 |
|                                                                 | 2/11                         | ..... ~ ~ ~ ..... T .....                                                 | R5                 |
| <b>CD14<sup>high</sup> CD16<sup>low</sup> monocytes</b>         |                              |                                                                           |                    |
|                                                                 | Consensus                    | C T R P N N N T R K R I R I Q R G P G R A F V T I G ~ K I G N M R Q A H C |                    |
|                                                                 | 17/20                        | .....                                                                     | X4                 |
|                                                                 | 1/20                         | ..... S .....                                                             | X4                 |
|                                                                 | 1/20                         | ..... G .....                                                             | X4                 |
|                                                                 | 1/20                         | ..... R .....                                                             | X4                 |
| <b>20</b>                                                       |                              |                                                                           |                    |
| <b>PBMC at baseline</b>                                         |                              |                                                                           |                    |
|                                                                 | Consensus                    | C T R P G N N T R K S V H I G P G R A F Y A T G D I I G D I R Q A H C     |                    |
|                                                                 | 14/16                        | .....                                                                     | R5                 |
|                                                                 | 1/16                         | ..... C .....                                                             | R5                 |
|                                                                 | 1/16                         | ..... E .....                                                             | R5                 |
| <b>Plasma on cART</b>                                           |                              |                                                                           |                    |
|                                                                 | Consensus                    | C T R P G N N T R K S V H I G P G R A F Y A T G D I I G D I R R A H C     |                    |
|                                                                 | 10/12                        | .....                                                                     | R5                 |
|                                                                 | 1/12                         | ..... V .....                                                             | R5                 |
|                                                                 | 1/12                         | ..... S .....                                                             | R5                 |
| <b>CD4<sup>+</sup> T-cells on cART</b>                          |                              |                                                                           |                    |
|                                                                 | Consensus                    | C T R P G N N T R K S V H I G P G R A F Y A T G D I I G D I R Q A H C     |                    |
|                                                                 | 7/11                         | .....                                                                     | R5                 |
|                                                                 | 2/11                         | ..... T .....                                                             | R5                 |
|                                                                 | 2/11                         | ..... K .....                                                             | R5                 |
|                                                                 | 2/11                         | ..... R .....                                                             | R5                 |

| Patient no.                                                   | No. of clones / total tested | Amino acid sequence of the V3 env region                              | Predicted genotype |
|---------------------------------------------------------------|------------------------------|-----------------------------------------------------------------------|--------------------|
| <b>22</b>                                                     |                              |                                                                       |                    |
| <b>PBMC at baseline</b>                                       |                              |                                                                       |                    |
|                                                               | Consensus                    | C T R P N N N T R K G I H L G P G G A F Y A T G E I I G N I R Q A H C |                    |
|                                                               | 11/16                        | .....                                                                 | R5                 |
|                                                               | 1/16                         | ..... A .....                                                         | R5                 |
|                                                               | 1/16                         | ..... R .....                                                         | R5                 |
|                                                               | 1/16                         | ..... R .....                                                         | R5                 |
|                                                               | 1/16                         | ..... R .....                                                         | R5                 |
|                                                               | 1/16                         | ..... R .....                                                         | R5                 |
|                                                               | 1/16                         | ..... R .....                                                         | R5                 |
| <b>CD4<sup>+</sup> T-cells on cART</b>                        |                              |                                                                       |                    |
|                                                               | Consensus                    | C M R P G N N T R K S I S I G P G R A F Y A T G D I I G N I R Q A H C |                    |
|                                                               | 6/13                         | .....                                                                 | R5                 |
|                                                               | 2/13                         | ..... T .....                                                         | R5                 |
|                                                               | 3/13                         | ..... I .....                                                         | R5                 |
|                                                               | 1/13                         | ..... I .....                                                         | R5                 |
|                                                               | 1/13                         | ..... T .....                                                         | R5                 |
|                                                               | 1/13                         | ..... T .....                                                         | R5                 |
| <b>CD16<sup>+</sup> monocytes on cART</b>                     |                              |                                                                       |                    |
|                                                               | Consensus                    | C T R P N N N T R K G I H L G P G G A F Y T T G E I I G D I R Q A H C |                    |
|                                                               | 20/24                        | .....                                                                 | R5                 |
|                                                               | 4/24                         | ..... A .....                                                         | R5                 |
| <b>25</b>                                                     |                              |                                                                       |                    |
| <b>Plasma on cART</b>                                         |                              |                                                                       |                    |
|                                                               | Consensus                    | C T R P N N N T R K S I H F G P G R A L Y A T G N I I G D I R Q A H C |                    |
|                                                               | 9/12                         | .....                                                                 | R5                 |
|                                                               | 1/12                         | ..... A .....                                                         | R5                 |
|                                                               | 1/12                         | ..... G .....                                                         | R5                 |
|                                                               | 1/12                         | ..... R .....                                                         | R5                 |
| <b>CD4<sup>+</sup> T-cells on cART</b>                        |                              |                                                                       |                    |
|                                                               | Consensus                    | C T R P N N N T R K S I H F G P G R A L Y A T G N I I G D I R Q A H C |                    |
|                                                               | 8/10                         | .....                                                                 | R5                 |
|                                                               | 1/10                         | ..... E .....                                                         | R5                 |
|                                                               | 1/10                         | ..... N .....                                                         | R5                 |
| <b>29</b>                                                     |                              |                                                                       |                    |
| <b>Plasma at baseline</b>                                     |                              |                                                                       |                    |
|                                                               | Consensus                    | C T R P N N N T R K G I H I G P G R A F Y A T E S I V G N I R Q A H C |                    |
|                                                               | 11/13                        | .....                                                                 | R5                 |
|                                                               | 1/13                         | ..... T .....                                                         | R5                 |
|                                                               | 1/13                         | ..... T .....                                                         | R5                 |
| <b>PBMC at baseline</b>                                       |                              |                                                                       |                    |
|                                                               | Consensus                    | C T R P N N N T R K G I H I G P G R A F Y A T E S I V G N I R Q A H C |                    |
|                                                               | 8/11                         | .....                                                                 | R5                 |
|                                                               | 1/11                         | ..... N .....                                                         | R5                 |
|                                                               | 1/11                         | ..... M .....                                                         | R5                 |
|                                                               | 1/11                         | ..... L .....                                                         | R5                 |
| <b>Plasma on cART</b>                                         |                              |                                                                       |                    |
|                                                               | Consensus                    | C T R P N N N T R K G I R I G P G R A F Y A T E R I V G N I R Q A H C |                    |
|                                                               | 8/13                         | .....                                                                 | X4                 |
|                                                               | 1/13                         | ..... S .....                                                         | X4                 |
|                                                               | 1/13                         | ..... S .....                                                         | X4                 |
|                                                               | 1/13                         | ..... R .....                                                         | X4                 |
|                                                               | 1/13                         | ..... K .....                                                         | X4                 |
|                                                               | 1/13                         | ..... T .....                                                         | X4                 |
| <b>CD4<sup>+</sup> T-cells on cART</b>                        |                              |                                                                       |                    |
|                                                               | Consensus                    | C T R P N N N T R K G I H I G P G R A F Y A T E R I V G N I R Q A H C |                    |
|                                                               | 6/12                         | .....                                                                 | X4                 |
|                                                               | 6/12                         | ..... S .....                                                         | R5                 |
| <b>CD14<sup>high</sup> CD16<sup>+</sup> monocytes on cART</b> |                              |                                                                       |                    |
|                                                               | Consensus                    | C T R P S N N T R T G I H M G P G R T L Y A T G A I T G N I R K A Y C |                    |
|                                                               | 12/13                        | .....                                                                 | R5                 |
|                                                               | 1/13                         | ..... A .....                                                         | R5                 |
| <b>CD16<sup>+</sup> monocytes on cART</b>                     |                              |                                                                       |                    |
|                                                               | Consensus                    | C T R P N N N T R K G I H I G P G R A F Y A T E S I V G N I R Q A H C |                    |
|                                                               | 11/12                        | .....                                                                 | R5                 |
|                                                               | 1/12                         | ..... M .....                                                         | R5                 |
